# Supplementary material
Source: Springer Nature journal article supplement (https://www.springermedizin.de/resource/supplementary/12968_2009_505_MOESM6_ESM.pdf/9579132)

- BB CMR (Round 1)

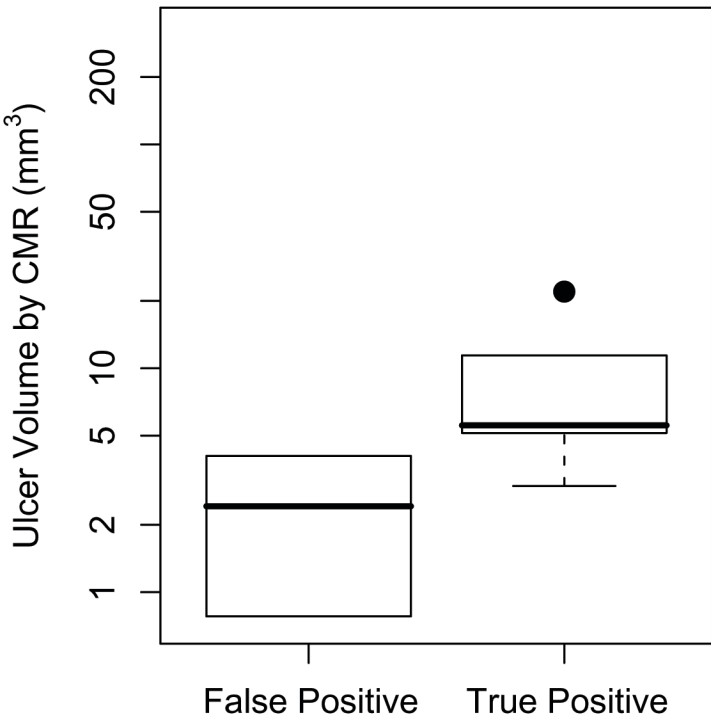

+ BB CMR (Round 2)

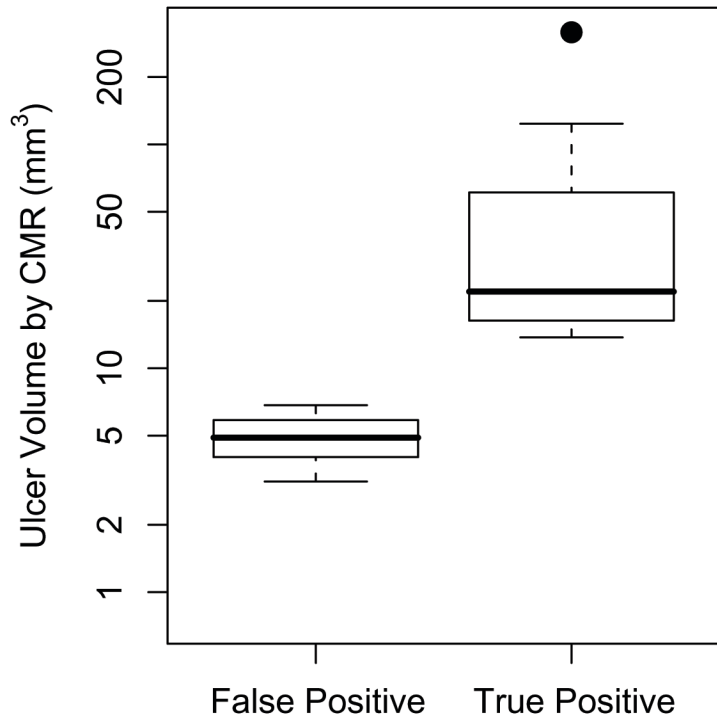

Supplement: MOESM6 [file 9579132]
